# Supplementary material for: RFRP3 influences basal lamina degradation, cellular death, and progesterone secretion in cultured preantral ovarian follicles from the domestic cat
Source: PeerJ journal article supplement (doi:10.7717/peerj.7540), 2019-08-23
Supplement: METADATA.pdf [file METADATA.pdf]

## Metadata for supplemental datasets

### **Dataset:** BasalLaminaDegradationDataset

Each row is a unique follicle used in experiments.

#### **Column descriptions**

**Plate:** ID of 96-well plate in which experiments were run (A-H)

**Well:** Well within 96-well plate in which follicle was cultured (B2-G11)

**TRT:** Treatment group (CON – vehicle control; FSH – 1 ug/mL FSH; LOW – 1 ug/mL FSH + 1 um fRFRP-3; HIGH - 1 ug/mL FSH + 10 um fRFRP-3)

**IsoDOY:** Day of the year on which follicles were isolated

**CLASS:** Class categorization of follicle type (all follicles used are preantral)

**0.Q-8.Q:** Quality score for follicle on days 0 through 8. (1, intact; 0, degraded)

**DAY:** Day on which follicle was observed as degraded (2, 4, 6, or 8)

**EVENT:** Occurrence of degradation (1, follicle degraded during culture; 0, follicle remained intact across culture period)

**Censor:** Inverse of Event

**L\_day:** Last day follicle was observed to be intact

**SIZE:** Area of the follicle on day 0 (um<sup>2</sup>)

### **Dataset:** FollicleSizeDataset

Each row is a unique observation of a follicle on day 0 or 8.

#### **Column descriptions**

**Plate:** ID of 96-well plate in which experiments were run (A-H)

**Well:** Well within 96-well plate in which follicle was cultured (B2-G11)

**TRT:** Treatment group (CON – vehicle control; FSH – 1 ug/mL FSH; LOW – 1 ug/mL FSH + 1 um fRFRP-3; HIGH - 1 ug/mL FSH + 10 um fRFRP-3)

**IsoDOY:** Day of the year on which follicles were isolated

**DAY:** Day of observation (0, 8)

**SIZE:** Area of the follicle (um<sup>2</sup>)

**lgS:** log-transformed area of the follicle (um<sup>2</sup>)

### **Dataset:** ProgesteroneData

Each row is progesterone data from a unique follicle used in experiments.

#### **Column descriptions**

**ID:** Numeric ID assigned during extractions

**CPLATE:** ID of 96-well plate in which experiments were run (A-H)

**Well:** Well within 96-well plate in which follicle was cultured (B2-G11)

**TRT:** Treatment group (CON – vehicle control; FSH – 1 ug/mL FSH; LOW – 1 ug/mL FSH + 1 um fRFRP-3; HIGH - 1 ug/mL FSH + 10 um fRFRP-3)

**Round:** Extraction round

**Date:** Extraction date

**Iso\_NOTES:** Qualitative notes on the extraction process, including any potential loss of sample

**EIA\_notes:** Notes on samples falling above or below limit of detection during ELISA

**CV:** coefficient of variation among duplicate wells in EIA

**CorrValue:** Concentration of progesterone measured in EIA

**precise:** Yes/no whether CorrValue is exact or from limits of standard curve

**day0size:** Area of the follicle on day 0 (um<sup>2</sup>)

**day8size:** Area of the follicle on day 8(um<sup>2</sup>)

**absdsize:** Percent change in size over culture period ( $\frac{100 \times [day\ 8 - day\ 0]}{day\ 0} + 100$ )

**Dataset:** LiveDeadData

Each row is counts of follicles in a given outcome and treatment group.

**Column descriptions**

**Iteration:** Round of experiment

**TRT:** Treatment group (CON – vehicle control; FSH – 1 ug/mL FSH; 1um – 1 ug/mL FSH + 1 um fRFRP-3; 10um - 1 ug/mL FSH + 10 um fRFRP-3)

**outcome:** Staining label (live, mix, dead) – **note:** for analyses, mix and dead were combined

**N:** Count of follicles categorized in this outcome based on fluorescent markers
