# Supplementary material for: RFRP3 influences basal lamina degradation, cellular death, and progesterone secretion in cultured preantral ovarian follicles from the domestic cat
Source: PeerJ. 2019 Aug 23;7:e7540. doi: 10.7717/peerj.7540 (PMC6709664; doi:10.7717/peerj.7540)
Supplement: Supplemental Information 2 [file peerj-07-7540-s002.csv]

Plate	Well	TRT	IsoDOY	CLASS	0.Q	2.Q	4.Q	6.Q	8.Q	DAY	EVENT	Censor	L_day	SIZE
A	B2	CON	28	preant	1	0	0	0	0	2	1	0	0	28001.31476
A	B3	CON	28	preant	1	0	0	0	0	2	1	0	0	55246.11098
A	B4	CON	28	preant	1	1	0	0	0	4	1	0	2	49595.36714
A	B6	CON	28	preant	1	1	1	0	0	6	1	0	4	21964.819
A	B7	CON	28	preant	1	1	1	0	0	6	1	0	4	26277.63334
A	B8	CON	28	preant	1	1	0	0	0	4	1	0	2	18084.38459
A	C10	CON	28	preant	1	1	1	1	1	8	0	1	8	28015.50282
A	C2	FSH	28	preant	1	1	1	1	1	8	0	1	8	32191.12054
A	C3	FSH	28	preant	1	1	1	1	1	8	0	1	8	29048.46645
A	D10	FSH	28	preant	1	1	1	1	1	8	0	1	8	23774.69053
A	D11	FSH	28	preant	1	1	1	1	1	8	0	1	8	27067.66407
A	D2	FSH	28	preant	1	1	0	0	0	4	1	0	2	24264.32866
A	D3	FSH	28	preant	1	0	0	0	0	2	1	0	0	45409.20847
A	D4	FSH	28	preant	1	1	1	0	0	6	1	0	4	47334.15167
A	D5	FSH	28	preant	1	1	1	1	1	8	0	1	8	31975.23494
A	D6	FSH	28	preant	1	1	1	1	1	8	0	1	8	41506.32179
A	D7	FSH	28	preant	1	1	1	1	0	8	1	0	6	56429.58878
A	D8	FSH	28	preant	1	1	1	1	1	8	0	1	8	22826.09467
A	D9	FSH	28	preant	1	1	0	0	0	4	1	0	2	20814.98979
A	F10	LOW	28	preant	1	1	1	1	1	8	0	1	8	30799.25401
A	F2	LOW	28	preant	1	0	0	0	0	2	1	0	0	60700.62375
A	F4	LOW	28	preant	1	0	0	0	0	2	1	0	0	37639.09002
A	F5	LOW	28	preant	1	1	1	0	0	6	1	0	4	35766.31962
A	F6	LOW	28	preant	1	1	1	1	0	8	1	0	6	39095.51946
A	F8	LOW	28	preant	1	1	1	1	1	8	0	1	8	16112.0907
A	G10	HIGH	28	preant	1	1	1	0	0	6	1	0	4	25008.26267
A	G11	HIGH	28	preant	1	1	1	1	1	8	0	1	8	21959.20163
A	G3	HIGH	28	preant	1	1	0	0	0	4	1	0	2	35568.62236
A	G4	HIGH	28	preant	1	1	1	1	1	8	0	1	8	16215.00698
A	G5	HIGH	28	preant	1	1	1	1	1	8	0	1	8	31195.82362
A	G6	HIGH	28	preant	1	1	1	1	1	8	0	1	8	32390.49545
A	G7	HIGH	28	preant	1	1	0	0	0	4	1	0	2	27875.69184
A	G8	HIGH	28	preant	1	1	0	0	0	4	1	0	2	36877.84534
A	G9	HIGH	28	preant	1	1	1	1	0	8	1	0	6	15652.58897
B	B11	CON	28	preant	1	1	1	1	1	8	0	1	8	30051.03417
B	B2	CON	28	preant	1	0	0	0	0	2	1	0	0	34967.44808
B	B5	CON	28	preant	1	1	1	0	0	6	1	0	4	26383.01857
B	B6	CON	28	preant	1	1	1	1	0	8	1	0	6	22967.37671
B	B7	CON	28	preant	1	1	1	1	1	8	0	1	8	69981.37364
B	B8	CON	28	preant	1	1	1	0	0	6	1	0	4	39858.90351
B	B9	CON	28	preant	1	1	1	1	1	8	0	1	8	20547.18466
B	C2A	FSH	28	preant	1	1	1	0	0	6	1	0	4	23291.48045
B	C2B	FSH	28	preant	1	1	1	0	0	6	1	0	4	21763.742
B	C3	FSH	28	preant	1	1	1	1	1	8	0	1	8	73782.29626
B	D10	FSH	28	preant	1	1	1	0	NA	6	1	0	4	13547.57825
B	D2	FSH	28	preant	1	1	1	0	NA	6	1	0	4	44557.16908
B	D4	FSH	28	preant	1	0	0	0	NA	2	1	0	0	51169.85097
B	D8	FSH	28	preant	1	0	0	0	NA	2	1	0	0	19315.31503
B	D9	FSH	28	preant	1	0	0	0	NA	2	1	0	0	24769.33733
B	E2	LOW	28	preant	1	1	1	1	0	8	1	0	6	13089.86452
B	E9	HIGH	28	preant	1	1	1	1	1	8	0	1	8	23300.86418
B	F10	LOW	28	preant	1	1	1	1	0	8	1	0	6	14475.99087
B	F11	LOW	28	preant	1	1	0	0	0	4	1	0	2	16756.43201
B	F2	LOW	28	preant	1	1	0	0	0	4	1	0	2	58396.30504
B	F4	LOW	28	preant	1	1	1	1	1	8	0	1	8	13832.46581
B	F5	LOW	28	preant	1	1	0	0	0	4	1	0	2	11560.8816
B	F7	LOW	28	preant	1	1	0	0	0	4	1	0	2	17476.37113
B	F8	LOW	28	preant	1	1	1	0	0	6	1	0	4	29172.25866
B	F9	LOW	28	preant	1	0	0	0	0	2	1	0	0	40979.81794
B	G10	HIGH	28	preant	1	1	0	0	0	4	1	0	2	29075.60736
B	G2	HIGH	28	preant	1	1	1	1	1	8	0	1	8	85764.41347
B	G3	HIGH	28	preant	1	1	1	1	1	8	0	1	8	21657.9376
B	G4	HIGH	28	preant	1	1	1	0	0	6	1	0	4	10321.19218
B	G5	HIGH	28	preant	1	1	0	0	0	4	1	0	2	20646.5556
B	G6	HIGH	28	preant	1	1	0	0	0	4	1	0	2	56821.92156
B	G7	HIGH	28	preant	1	1	1	1	1	8	0	1	8	77336.96769
B	G9	HIGH	28	preant	1	0	0	0	0	2	1	0	0	30589.58426
C	B10	CON	30	preant	1	1	1	0	0	6	1	0	4	27111.69273
C	B11	CON	30	preant	1	1	0	0	0	4	1	0	2	25913.91476
C	B2	CON	30	preant	1	1	0	0	0	4	1	0	2	29952.86786
C	B3	CON	30	preant	1	1	0	0	0	4	1	0	2	20727.19215
C	B5	CON	30	preant	1	1	1	0	0	6	1	0	4	23383.83213
C	B6	CON	30	preant	1	1	0	0	0	4	1	0	2	19651.42972
C	B8	CON	30	preant	1	1	1	0	0	6	1	0	4	30617.00494
C	B9	CON	30	preant	1	0	0	0	0	2	1	0	0	16668.33422
C	C10	FSH	30	preant	1	1	1	1	1	8	0	1	8	20179.64266
C	C2	CON	30	preant	1	1	0	0	0	4	1	0	2	24222.24743
C	C3	CON	30	preant	1	0	0	0	0	2	1	0	0	21992.74391
C	C4	CON	30	preant	1	0	0	0	0	2	1	0	0	23252.5669
C	C5	CON	30	preant	1	1	1	1	0	8	1	0	6	22037.72077
C	C8	FSH	30	preant	1	1	1	0	0	6	1	0	4	18285.50555
C	C9	FSH	30	preant	1	0	0	0	0	2	1	0	0	19359.3942
C	D10	FSH	30	preant	1	1	1	1	0	8	1	0	6	16803.56748
C	D11	FSH	30	preant	1	1	1	1	1	8	0	1	8	31391.47137
C	D2	FSH	30	preant	1	1	0	0	0	4	1	0	2	24169.06594
C	D3	FSH	30	preant	1	1	1	0	0	6	1	0	4	35897.67399
C	D4	FSH	30	preant	1	1	1	1	1	8	0	1	8	22407.22298
C	D5a	FSH	30	preant	1	1	0	0	0	4	1	0	2	14403.02762
C	D5b	FSH	30	preant	1	1	0	0	0	4	1	0	2	21397.5055
C	D6	FSH	30	preant	1	0	0	0	0	2	1	0	0	23602.6069
C	D8	FSH	30	preant	1	1	1	0	0	6	1	0	4	21916.04602
C	E2	LOW	30	preant	1	1	1	0	0	6	1	0	4	34458.88496
C	G10	HIGH	30	preant	1	1	0	0	0	4	1	0	2	17448.09964
C	G11	HIGH	30	preant	1	1	0	0	0	4	1	0	2	27882.58606
C	G3	HIGH	30	preant	1	0	0	0	0	2	1	0	0	19353.76005
C	G4	HIGH	30	preant	1	0	0	0	0	2	1	0	0	33648.11267
C	G5	HIGH	30	preant	1	1	1	1	0	8	1	0	6	17895.41938
C	G6	HIGH	30	preant	1	0	0	0	0	2	1	0	0	26096.14596
C	G7	HIGH	30	preant	1	1	0	0	0	4	1	0	2	31462.85158
C	G8	HIGH	30	preant	1	1	1	1	0	8	1	0	6	18384.2784
C	G9	HIGH	30	preant	1	0	0	0	0	2	1	0	0	27766.26604
D	B10	CON	30	preant	1	1	1	1	1	8	0	1	8	22614.01087
D	B2	CON	30	preant	1	1	1	1	1	8	0	1	8	15892.58969
D	B3	CON	30	preant	1	0	0	0	0	2	1	0	0	18738.15485
D	B4	CON	30	preant	1	1	1	1	0	8	1	0	6	18405.95082
D	B5	CON	30	preant	1	1	0	0	0	4	1	0	2	23997.00654
D	B6	CON	30	preant	1	0	0	0	0	2	1	0	0	19576.74001
D	B7	CON	30	preant	1	1	0	0	0	4	1	0	2	19708.02695
D	B9	CON	30	preant	1	1	0	0	0	4	1	0	2	6028.836233
D	D10	FSH	30	preant	1	1	1	0	0	6	1	0	4	25612.44537
D	D11	FSH	30	preant	1	1	1	0	0	6	1	0	4	16768.93959
D	D2	FSH	30	preant	1	1	1	1	0	8	1	0	6	31853.76243
D	D4	FSH	30	preant	1	1	1	1	1	8	0	1	8	24527.91853
D	D5	FSH	30	preant	1	1	1	0	0	6	1	0	4	7567.195517
D	D7	FSH	30	preant	1	1	1	0	0	6	1	0	4	38199.34982
D	D8	FSH	30	preant	1	1	1	1	1	8	0	1	8	30474.0049
D	D9	FSH	30	preant	1	1	0	0	0	4	1	0	2	17362.32625
D	F11	LOW	30	preant	1	0	0	0	0	2	1	0	0	16357.21049
D	F2	LOW	30	preant	1	1	0	0	0	4	1	0	2	40739.99065
D	F3	LOW	30	preant	1	0	0	0	0	2	1	0	0	46413.55944
D	F4	LOW	30	preant	1	1	1	0	0	6	1	0	4	29676.03293
D	F5	LOW	30	preant	1	1	0	0	0	4	1	0	2	19390.59556
D	F6	LOW	30	preant	1	1	1	1	1	8	0	1	8	14719.30128
D	F8	LOW	30	preant	1	0	0	0	0	2	1	0	0	19818.87883
D	F9	LOW	30	preant	1	1	1	0	0	6	1	0	4	39581.9735
D	G10a	HIGH	30	preant	1	1	1	1	0	8	1	0	6	21469.9838
D	G10b	HIGH	30	preant	1	0	0	0	0	2	1	0	0	19834.27188
D	G11b	HIGH	30	preant	1	0	0	0	0	2	1	0	0	21477.78496
D	G2	HIGH	30	preant	1	1	1	1	1	8	0	1	8	30506.74484
D	G4	HIGH	30	preant	1	1	0	0	0	4	1	0	2	37988.1362
D	G5	HIGH	30	preant	1	1	1	1	1	8	0	1	8	17976.80657
D	G6	HIGH	30	preant	1	1	1	0	0	6	1	0	4	11415.34124
D	G7	HIGH	30	preant	1	1	1	1	0	8	1	0	6	26181.53937
D	G8	HIGH	30	preant	1	1	1	1	0	8	1	0	6	17840.6037
D	G9	HIGH	30	preant	1	0	0	0	0	2	1	0	0	28108.56552
E	B10	LOW	56	preant	1	1	0	0	0	4	1	0	2	17562.53262
E	B11	LOW	56	preant	1	1	1	0	0	6	1	0	4	24874.70446
E	B2	CON	56	preant	1	1	1	1	1	8	0	1	8	19018.95279
E	B3	CON	56	preant	1	0	0	0	0	2	1	0	0	9299.718773
E	B4	CON	56	preant	1	1	0	NA	0	4	1	0	2	19893.76449
E	B5	CON	56	preant	1	1	0	0	0	4	1	0	2	27633.57226
E	B8	LOW	56	preant	1	1	1	1	1	8	0	1	8	16279.93684
E	B9	LOW	56	preant	1	0	0	0	0	2	1	0	0	28516.44751
E	C10	LOW	56	preant	1	1	1	0	0	6	1	0	4	19026.90901
E	C11	LOW	56	preant	1	1	1	1	1	8	0	1	8	27002.99191
E	C2	CON	56	preant	1	1	1	0	0	6	1	0	4	23525.46103
E	C3	CON	56	preant	1	1	0	0	0	4	1	0	2	27495.10813
E	C4	CON	56	preant	1	1	1	1	1	8	0	1	8	14107.82236
E	C5	CON	56	preant	1	1	1	0	0	6	1	0	4	18589.26829
E	C8a	LOW	56	preant	1	1	0	0	0	4	1	0	2	22621.44601
E	C8b	LOW	56	preant	1	0	0	0	0	2	1	0	0	14037.77863
E	C9	LOW	56	preant	1	1	1	1	0	8	1	0	6	37507.65447
E	D10	LOW	56	preant	1	1	1	1	1	8	0	1	8	7017.996283
E	D11	LOW	56	preant	1	1	1	1	1	8	0	1	8	56621.1916
E	D2	CON	56	preant	1	0	0	0	0	2	1	0	0	22669.47034
E	D3	CON	56	preant	1	1	1	1	1	8	0	1	8	33303.88705
E	D4	CON	56	preant	1	0	0	0	0	2	1	0	0	29547.49669
E	D5	CON	56	preant	1	1	1	1	0	8	1	0	6	29608.56499
E	D8	LOW	56	preant	1	1	1	1	0	8	1	0	6	32058.76092
E	D9	LOW	56	preant	1	1	1	1	1	8	0	1	8	19156.60488
E	E10	HIGH	56	preant	1	0	0	0	0	2	1	0	0	14622.63143
E	E11	HIGH	56	preant	1	1	1	1	1	8	0	1	8	26103.08621
E	E2	FSH	56	preant	1	1	1	1	1	8	0	1	8	20106.97329
E	E3	FSH	56	preant	1	1	1	1	1	8	0	1	8	26788.21188
E	E4	FSH	56	preant	1	1	1	1	1	8	0	1	8	20235.26029
E	E8	HIGH	56	preant	1	1	1	1	1	8	0	1	8	17045.75901
E	E9	HIGH	56	preant	1	0	0	0	0	2	1	0	0	19827.21766
E	F11a	HIGH	56	preant	1	0	0	0	0	2	1	0	0	20763.40123
E	F11b	HIGH	56	preant	1	0	NA	0	0	2	1	0	0	16983.91481
E	F2	FSH	56	preant	1	1	1	1	0	8	1	0	6	36377.37746
E	F3	FSH	56	preant	1	1	1	1	1	8	0	1	8	22868.12609
E	F4	FSH	56	preant	1	1	0	0	0	4	1	0	2	25591.34927
E	F5	FSH	56	preant	1	1	1	1	1	8	0	1	8	22027.45365
E	F8	HIGH	56	preant	1	1	1	1	0	8	1	0	6	16511.28544
E	F9	HIGH	56	preant	1	0	0	0	0	2	1	0	0	30409.73572
E	G10	HIGH	56	preant	1	0	0	0	0	2	1	0	0	42136.5602
E	G2	FSH	56	preant	1	1	1	1	1	8	0	1	8	17335.68417
E	G4	FSH	56	preant	1	0	0	0	0	2	1	0	0	14339.34458
E	G5	FSH	56	preant	1	1	0	0	0	4	1	0	2	18335.28769
E	G9	HIGH	56	preant	1	0	0	0	0	2	1	0	0	18956.72115
G	B10	LOW	56	preant	1	0	0	0	0	2	1	0	0	15071.85876
G	B11	LOW	56	preant	1	1	1	1	1	8	0	1	8	19980.98067
G	B2	CON	56	preant	1	1	1	1	1	8	0	1	8	9170.148993
G	B3	CON	56	preant	1	1	1	1	1	8	0	1	8	18121.56878
G	B4	CON	56	preant	1	1	0	0	0	4	1	0	2	47120.11956
G	B5	CON	56	preant	1	1	1	0	0	6	1	0	4	19578.22704
G	B8	LOW	56	preant	1	1	1	1	0	8	1	0	6	15072.78371
G	B9	LOW	56	preant	1	1	1	1	1	8	0	1	8	11574.59773
G	C10	LOW	56	preant	1	1	1	1	0	8	1	0	6	19363.72696
G	C11	LOW	56	preant	1	1	1	1	1	8	0	1	8	20241.84638
G	C11 (B)	LOW	56	preant	1	1	1	1	0	8	1	0	6	33383.73529
G	C2	CON	56	preant	1	1	1	1	1	8	0	1	8	20959.4849
G	C3	CON	56	preant	1	1	1	0	0	6	1	0	4	18732.48324
G	C4	CON	56	preant	1	0	0	0	0	2	1	0	0	30122.49607
G	C5	CON	56	preant	1	1	1	1	1	8	0	1	8	21182.81973
G	C8	LOW	56	preant	1	1	1	1	1	8	0	1	8	14187.17258
G	C9	LOW	56	preant	1	1	1	1	1	8	0	1	8	27770.64878
G	D11	LOW	56	preant	1	1	1	1	1	8	0	1	8	24684.29589
G	E2	FSH	56	preant	1	1	1	1	1	8	0	1	8	17233.66877
G	E3	FSH	56	preant	1	1	1	1	1	8	0	1	8	18638.66823
G	E4	FSH	56	preant	1	1	1	1	0	8	1	0	6	18616.49704
G	E5	FSH	56	preant	1	1	1	1	1	8	0	1	8	23585.97987
G	E8	HIGH	56	preant	1	1	1	1	1	8	0	1	8	69867.32354
G	F10	HIGH	56	preant	1	1	1	1	1	8	0	1	8	14945.20633
G	F11	HIGH	56	preant	1	1	1	1	1	8	0	1	8	24356.94595
G	F2	FSH	56	preant	1	1	1	1	0	8	1	0	6	10140.26937
G	F3	FSH	56	preant	1	1	1	1	1	8	0	1	8	20170.21734
G	F8	HIGH	56	preant	1	1	1	1	1	8	0	1	8	15410.66532
G	F9	HIGH	56	preant	1	1	0	0	0	4	1	0	2	38266.06985
G	G10	HIGH	56	preant	1	1	1	1	1	8	0	1	8	18402.51069
G	G11	HIGH	56	preant	1	0	0	0	0	2	1	0	0	23943.11285
G	G8	HIGH	56	preant	1	1	1	1	1	8	0	1	8	23384.83294
G	G9	HIGH	56	preant	1	1	1	1	1	8	0	1	8	19997.05444
H	B11	LOW	57	preant	1	1	0	0	0	4	1	0	2	17205.66749
H	B2	CON	57	preant	1	1	1	1	1	8	0	1	8	20112.41654
H	B4	CON	57	preant	1	1	1	0	0	6	1	0	4	18650.96762
H	B5	CON	57	preant	1	0	0	0	0	2	1	0	0	6012.834781
H	B6	CON	57	preant	1	1	0	0	0	4	1	0	2	19541.4769
H	B8	LOW	57	preant	1	1	1	0	0	6	1	0	4	15825.04969
H	B9	LOW	57	preant	1	1	1	0	0	6	1	0	4	15697.14317
H	C10	LOW	57	preant	1	0	0	0	0	2	1	0	0	18601.0955
H	C2	CON	57	preant	1	0	0	0	0	2	1	0	0	15806.02744
H	C3	CON	57	preant	1	0	0	0	0	2	1	0	0	20503.0829
H	C4	CON	57	preant	1	1	1	0	0	6	1	0	4	17118.04962
H	C5	CON	57	preant	1	1	1	1	1	8	0	1	8	16936.72322
H	C8	LOW	57	preant	1	1	1	1	1	8	0	1	8	15895.55091
H	C9	LOW	57	preant	1	1	1	0	0	6	1	0	4	20996.61756
H	E11	HIGH	57	preant	1	1	1	1	1	8	0	1	8	24046.05711
H	E2	FSH	57	preant	1	1	0	0	0	4	1	0	2	16962.71424
H	E3	FSH	57	preant	1	0	0	0	0	2	1	0	0	14245.32648
H	E8	HIGH	57	preant	1	0	0	0	0	2	1	0	0	12511.05014
H	F10	HIGH	57	preant	1	1	1	0	0	6	1	0	4	18506.0147
H	F11	HIGH	57	preant	1	1	NA	1	1	8	0	1	8	14436.42708
H	F2	FSH	57	preant	1	1	1	1	1	8	0	1	8	18102.14766
H	F8	HIGH	57	preant	1	1	0	0	0	4	1	0	2	19353.49696
H	F9	HIGH	57	preant	1	1	1	0	0	6	1	0	4	22568.77221
H	G10	HIGH	57	preant	1	1	1	1	1	8	0	1	8	30968.04088
H	G11	HIGH	57	preant	1	1	1	1	1	8	0	1	8	19612.64527
H	G2	FSH	57	preant	1	1	1	1	1	8	0	1	8	15834.96649
H	G3	FSH	57	preant	1	1	1	1	0	8	1	0	6	19514.15173
H	G4	FSH	57	preant	1	1	1	1	1	8	0	1	8	17935.01856
H	G9	HIGH	57	preant	1	1	0	0	0	4	1	0	2	15284.12215
